# Supplementary material for: Structural and biochemical evidence supporting poly ADP-ribosylation in the bacterium Deinococcus radiodurans
Source: PubMed Central journal article supplement (PMC6445106; doi:10.1038/s41467-019-09153-6), 2019-04-02
Supplement: 41467_2019_9153_MOESM3_ESM.pdf [file 41467_2019_9153_MOESM3_ESM.pdf]

## Reporting Summary

Nature Research wishes to improve the reproducibility of the work that we publish. This form provides structure for consistency and transparency in reporting. For further information on Nature Research policies, see [Authors & Referees](#) and the [Editorial Policy Checklist](#).

### Statistics

For all statistical analyses, confirm that the following items are present in the figure legend, table legend, main text, or Methods section.

n/a Confirmed

- The exact sample size ( $n$ ) for each experimental group/condition, given as a discrete number and unit of measurement
- A statement on whether measurements were taken from distinct samples or whether the same sample was measured repeatedly
- The statistical test(s) used AND whether they are one- or two-sided  
*Only common tests should be described solely by name; describe more complex techniques in the Methods section.*
- A description of all covariates tested
- A description of any assumptions or corrections, such as tests of normality and adjustment for multiple comparisons
- A full description of the statistical parameters including central tendency (e.g. means) or other basic estimates (e.g. regression coefficient) AND variation (e.g. standard deviation) or associated estimates of uncertainty (e.g. confidence intervals)
- For null hypothesis testing, the test statistic (e.g.  $F$ ,  $t$ ,  $r$ ) with confidence intervals, effect sizes, degrees of freedom and  $P$  value noted  
*Give  $P$  values as exact values whenever suitable.*
- For Bayesian analysis, information on the choice of priors and Markov chain Monte Carlo settings
- For hierarchical and complex designs, identification of the appropriate level for tests and full reporting of outcomes
- Estimates of effect sizes (e.g. Cohen's  $d$ , Pearson's  $r$ ), indicating how they were calculated

*Our web collection on [statistics for biologists](#) contains articles on many of the points above.*

### Software and code

Policy information about [availability of computer code](#)

Data collection

X-ray diffraction data were collected at National Synchrotron Radiation Research Center, beamlines TLS 13B1, TLS 13C1, and TPS 05A in Taiwan. Data were indexed, integrated and scaled using the program HKL2000.

Data analysis

Data were refined using the program PHENIX, quality was analyzed using Molprobtity and Procheck, and graphics were generated using PyMol.

For manuscripts utilizing custom algorithms or software that are central to the research but not yet described in published literature, software must be made available to editors/reviewers. We strongly encourage code deposition in a community repository (e.g. GitHub). See the Nature Research [guidelines for submitting code & software](#) for further information.

### Data

Policy information about [availability of data](#)

All manuscripts must include a [data availability statement](#). This statement should provide the following information, where applicable:

- Accession codes, unique identifiers, or web links for publicly available datasets
- A list of figures that have associated raw data
- A description of any restrictions on data availability

Coordinates for the structures have been deposited to RCSB Protein DataBank with PDB IDs 5ZDA, 5ZDB, 5ZDC, 5ZDD, 5ZDE, 5ZDF, and 5ZDG.

### Field-specific reporting

Please select the one below that is the best fit for your research. If you are not sure, read the appropriate sections before making your selection.

- Life sciences       Behavioural & social sciences       Ecological, evolutionary & environmental sciences

## Life sciences study design

All studies must disclose on these points even when the disclosure is negative.

|                 |                                                                                       |
|-----------------|---------------------------------------------------------------------------------------|
| Sample size     | Not relevant                                                                          |
| Data exclusions | No data were excluded                                                                 |
| Replication     | All experiments were repeated as described in the methods, which were all successful. |
| Randomization   | Not relevant                                                                          |
| Blinding        | Not relevant                                                                          |

## Reporting for specific materials, systems and methods

We require information from authors about some types of materials, experimental systems and methods used in many studies. Here, indicate whether each material, system or method listed is relevant to your study. If you are not sure if a list item applies to your research, read the appropriate section before selecting a response.

### Materials & experimental systems

### Methods

| n/a                                 | Involvement in the study                             |
|-------------------------------------|------------------------------------------------------|
| <input type="checkbox"/>            | <input checked="" type="checkbox"/> Antibodies       |
| <input checked="" type="checkbox"/> | <input type="checkbox"/> Eukaryotic cell lines       |
| <input checked="" type="checkbox"/> | <input type="checkbox"/> Palaeontology               |
| <input checked="" type="checkbox"/> | <input type="checkbox"/> Animals and other organisms |
| <input checked="" type="checkbox"/> | <input type="checkbox"/> Human research participants |
| <input checked="" type="checkbox"/> | <input type="checkbox"/> Clinical data               |

| n/a                                 | Involvement in the study                        |
|-------------------------------------|-------------------------------------------------|
| <input checked="" type="checkbox"/> | <input type="checkbox"/> ChIP-seq               |
| <input checked="" type="checkbox"/> | <input type="checkbox"/> Flow cytometry         |
| <input checked="" type="checkbox"/> | <input type="checkbox"/> MRI-based neuroimaging |

## Antibodies

Antibodies used

Primary antibodies used in this study: Anti-PAR monoclonal antibody (Enzo Life Sciences; Cat# ALX-804-220-R100; Clone 10H), Anti-Biotin polyclonal antibody (Bethyl Laboratories, Inc; Cat# A150-109A), Anti-pan-ADP-ribose binding reagent (Millipore; Cat# MABE1016).  
Secondary antibodies used in this study: Anti-mouse IgG (PerkinElmer; Cat# NEF822001EA), Anti-rabbit IgG (Bethyl Laboratories, Inc; Cat# A120-101P).

Validation

The antibodies were purchased by commercial sources (Enzo Life Sciences, Bethyl Laboratories, Millipore, PerkinElmer). Validations were done by the vendors and reported by other researches on the websites.
